# Supplementary material for: Genomic regions with distinct genomic distance conservation in vertebrate genomes
Source: PubMed Central journal article supplement (PMC2667192; doi:10.1186/1471-2164-10-133), 2009-03-27

**Additional file 2:** The flowchart to assign unique homologous HCE hits in the query genomes.

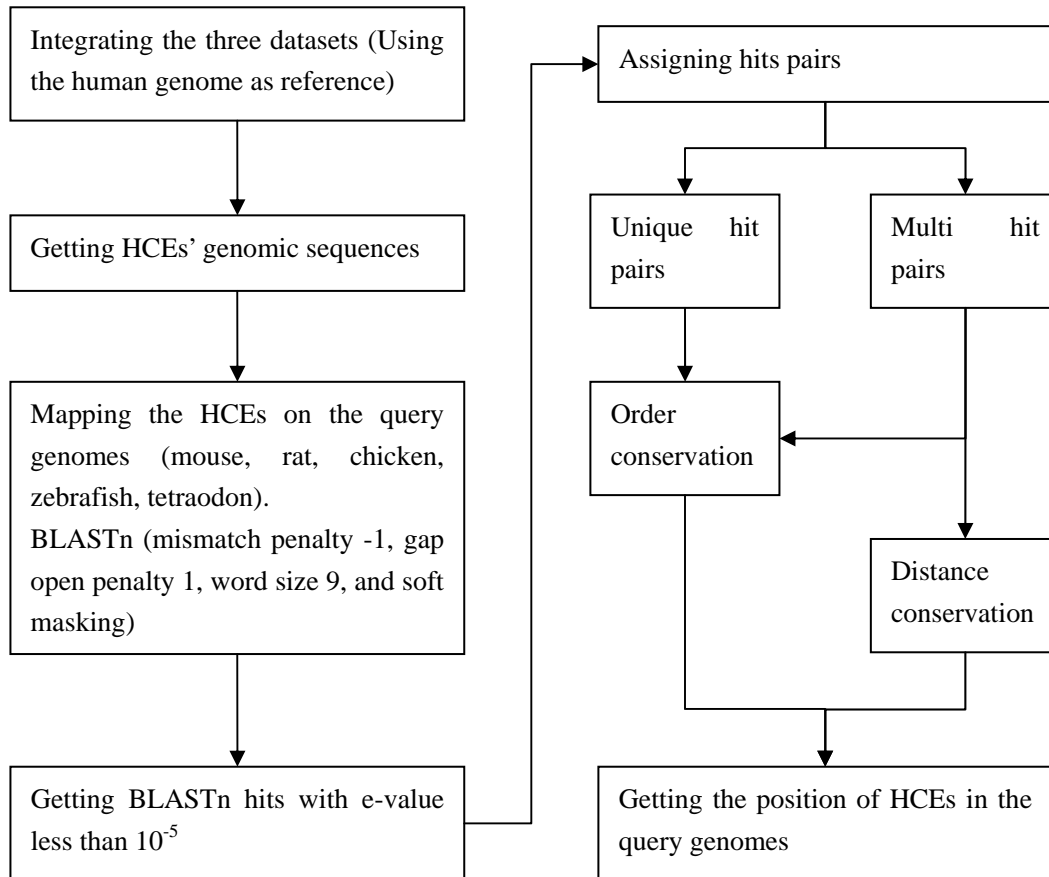

Supplement: 1471-2164-10-133-S2.pdf [file 1471-2164-10-133-S2.pdf]
