# Supplementary material for: Genomic regions with distinct genomic distance conservation in vertebrate genomes
Source: PubMed Central journal article supplement (PMC2667192; doi:10.1186/1471-2164-10-133), 2009-03-27
Supplement: 1471-2164-10-133-S3.pdf [file 1471-2164-10-133-S3.pdf]

**Additional file 3:** Number of HCE pairs in each category defined under a series of screening constraints (Additional file 2).

|                 | Chicken |      | Frog   |      | Zebrafish |      | Tetraodon |      | Fugu   |      |       |
|-----------------|---------|------|--------|------|-----------|------|-----------|------|--------|------|-------|
|                 | Number  | (%)  | Number | (%)  | Number    | (%)  | Number    | (%)  | Number | (%)  |       |
| S               | SA      | 4442 | 94.39  | 3155 | 88.95     | 836  | 59.71     | 1037 | 81.33  | 1236 | 76.53 |
|                 | SB      | 29   | 0.62   | 0    | 0         | 0    | 0         | 0    | 0      | 0    | 0     |
|                 | SC      | 16   | 0.34   | 132  | 3.72      | 117  | 8.36      | 98   | 7.69   | 181  | 11.21 |
|                 | Total S | 4487 | 95.35  | 3287 | 92.67     | 953  | 68.07     | 1135 | 89.02  | 1417 | 87.74 |
| M               | MA      | 198  | 4.21   | 220  | 6.20      | 381  | 27.21     | 112  | 8.78   | 140  | 8.67  |
|                 | MB      | 15   | 0.32   | 24   | 0.68      | 16   | 1.14      | 10   | 0.78   | 19   | 1.18  |
|                 | MC      | 5    | 0.11   | 0    | 0         | 0    | 0         | 0    | 0      | 0    | 0     |
|                 | MD      | 1    | 0.02   | 16   | 0.45      | 50   | 3.57      | 18   | 1.41   | 39   | 2.41  |
|                 | Total M | 219  | 4.65   | 260  | 7.33      | 447  | 31.93     | 140  | 10.98  | 198  | 12.26 |
| Total HCE pairs | 4706    | 100  | 3547   | 100  | 1400      | 100  | 1275      | 100  | 1615   | 100  |       |
| Total HCEs      | 5385    | 71.1 | 4470   | 59.0 | 2015      | 26.6 | 1831      | 24.2 | 2323   | 30.7 |       |

**S:** two HCEs of a pair are unique in the query genome; **SA:** there are at least one HCE pair linked in the query genome as they do in the human genome; **SB:** no other HCE pairs are linked but they are linked with orthologous genes; **SC:** neither other HCE pairs nor orthologous genes linked with them. **M:** one or two HCEs of a pair have multi BLASTn hits; **MA:** there are at least one HCE pair linked in the query genome as they do in the human genome, with minimum |RDD|; **MB:** there are at least one HCE pair linked in the query genome as they do in the human genome, with hyper-minimum |RDD|; **MC:** no other HCE pairs are linked but there are orthologous genes linked with them; **MD:** neither other HCE pairs nor orthologous genes linked, with minimum |RDD|.
