# Supplementary material for: Genomic regions with distinct genomic distance conservation in vertebrate genomes
Source: PubMed Central journal article supplement (PMC2667192; doi:10.1186/1471-2164-10-133), 2009-03-27
Supplement: 1471-2164-10-133-S4.pdf [file 1471-2164-10-133-S4.pdf]

**Additional file 4:** Cumulative percentage of HCEs with increasing number of linked HCEs

|           | $\geq 2$ | $\geq 3$ | $\geq 4$ | $\geq 5$ | $\geq 6$ | $\geq 7$ | $\geq 8$ | $\geq 9$ | $\geq 10$ |
|-----------|----------|----------|----------|----------|----------|----------|----------|----------|-----------|
| Mouse     | 99.7     | 99.3     | 97.7     | 97.5     | 96.8     | 96.4     | 95.7     | 95.2     | 94.6      |
| Rat       | 99.6     | 99.1     | 97.5     | 97.1     | 97.5     | 93.7     | 92.9     | 91.8     | 90.8      |
| Chicken   | 99.9     | 98.4     | 97.5     | 96.5     | 95.3     | 93.7     | 92.1     | 90.0     | 88.2      |
| Frog      | 99.8     | 93.7     | 89.1     | 85.0     | 80.2     | 77.3     | 74.8     | 72.4     | 70.3      |
| Zebrafish | 99.6     | 82.4     | 73.7     | 64.7     | 58.0     | 52.1     | 46.3     | 40.4     | 36.7      |
| Tetraodon | 99.5     | 83.9     | 75.6     | 69.7     | 64.9     | 57.7     | 54.9     | 50.3     | 46.6      |
| Fugu      | 99.4     | 81.1     | 70.5     | 62.4     | 56.7     | 50.7     | 44.6     | 40.8     | 37.1      |
