# Supplementary material for: Genomic regions with distinct genomic distance conservation in vertebrate genomes
Source: PubMed Central journal article supplement (PMC2667192; doi:10.1186/1471-2164-10-133), 2009-03-27
Supplement: 1471-2164-10-133-S5.pdf [file 1471-2164-10-133-S5.pdf]

**Additional file 5:** RDDs between HCE, gene and exon pairs of the five non-mamalian species compared with human.

|                      |                     | Human-Chicken | Human-Frog | Human-Zebrafish | Human-Tetraodon | Human-Fugu |         |
|----------------------|---------------------|---------------|------------|-----------------|-----------------|------------|---------|
| <b>HCE-HCE</b>       | No. of pairs        | 4706          | 3547       | 1400            | 1275            | 1615       |         |
|                      | RDD                 | Median        | -0.4274    | -0.1690         | -0.2944         | -1.0930    | -1.0140 |
|                      |                     | Mean          | -0.4587    | -0.2715         | -0.3407         | -0.8890    | -0.8483 |
|                      | RDD                 | Median        | 0.4641     | 0.4635          | 0.5666          | 1.1010     | 1.0320  |
|                      |                     | Mean          | 0.5168     | 0.5545          | 0.6558          | 0.9836     | 0.9438  |
|                      | <b>Exon-Exon</b>    | No. of pairs  | 80638      |                 | 34267           | 50585      | 48964   |
| RDD                  |                     | Median        | -0.6776    |                 | -0.6006         | -1.3190    | -1.3610 |
|                      |                     | Mean          | -0.5294    |                 | -0.4118         | -1.0380    | -1.0750 |
| RDD                  |                     | Median        | 0.9472     |                 | 1.1190          | 1.3430     | 1.3840  |
|                      |                     | Mean          | 0.9569     |                 | 1.0660          | 1.2000     | 1.2280  |
| <b>Gene-Gene</b>     |                     | No. of pairs  | 6375       |                 | 604             | 1673       | 1833    |
|                      | RDD                 | Median        | -0.9054    |                 | -0.9329         | -1.6220    | -1.6170 |
|                      |                     | Mean          | -0.8480    |                 | -0.7298         | -1.4670    | -0.4730 |
|                      | RDD                 | Median        | 0.9125     |                 | 1.0400          | 1.624      | 1.617   |
|                      |                     | Mean          | 0.8999     |                 | 0.9741          | 1.4930     | 1.4920  |
|                      | p* value (HCE,Exon) |               | 2.2e-16    |                 | 2.2e-16         | 2.2e-16    | 2.2e-16 |
| p* value (HCE,Gene)  |                     | 2.2e-16       |            | 2.2e-16         | 2.2e-16         | 2.2e-16    |         |
| p* value (Exon,Gene) |                     | 2.3e-12       |            | 6.4e-06         | 2.2e-16         | 2.2e-16    |         |

\* Wilcoxon's unpaired test was used to test the significance.
