# Supplementary material for: Genomic regions with distinct genomic distance conservation in vertebrate genomes
Source: PubMed Central journal article supplement (PMC2667192; doi:10.1186/1471-2164-10-133), 2009-03-27

**Additional file 6:** RDD distributions of three sets of data (HCE, gene and exon)

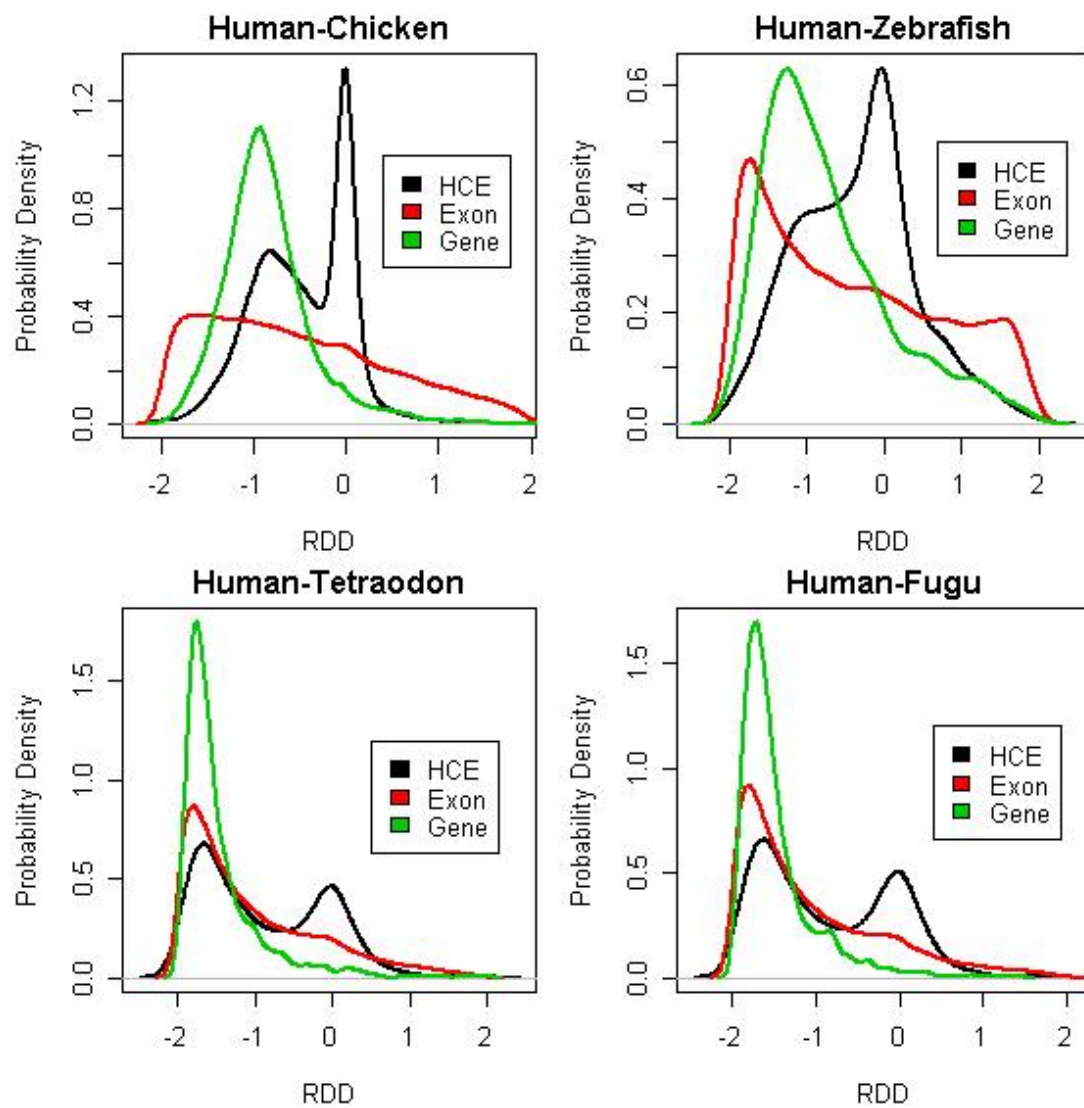

Supplement: 1471-2164-10-133-S6.pdf [file 1471-2164-10-133-S6.pdf]
