# Supplementary material for: Genomic regions with distinct genomic distance conservation in vertebrate genomes
Source: PubMed Central journal article supplement (PMC2667192; doi:10.1186/1471-2164-10-133), 2009-03-27
Supplement: 1471-2164-10-133-S7.pdf [file 1471-2164-10-133-S7.pdf]

**Additional file 7:** |RDD| range within the percentage range of HCE pairs.

---

| Percentage<br>$\leq$ | Human-Chicken | Human-Frog | Human-Zebrafish | Human-Tetraodon | Human-Fugu |
|----------------------|---------------|------------|-----------------|-----------------|------------|
| 68 %                 | 0.766         | 0.766      | 0.896           | 1.505           | 1.467      |
| 50 %                 | 0.465         | 0.464      | 0.568           | 1.102           | 1.032      |
| 40 %                 | 0.275         | 0.303      | 0.387           | 0.758           | 0.651      |
| 30 %                 | 0.116         | 0.169      | 0.251           | 0.409           | 0.349      |

---
