# Supplementary material for: Genomic regions with distinct genomic distance conservation in vertebrate genomes
Source: PubMed Central journal article supplement (PMC2667192; doi:10.1186/1471-2164-10-133), 2009-03-27
Supplement: 1471-2164-10-133-S8.pdf [file 1471-2164-10-133-S8.pdf]

**Additional file 8:** Number of HCE pairs in each category according to human – non-mammalian pair wise comparison (see definition of categories in Additional file 3).

| Categories |       | Query genomes |      |           |           |      |
|------------|-------|---------------|------|-----------|-----------|------|
|            |       | Chicken       | Frog | Zebrafish | Tetraodon | Fugu |
| S          | SA    | 352           | 324  | 226       | 319       | 303  |
|            | SB    | 1             | 0    | 0         | 0         | 0    |
|            | SC    | 5             | 16   | 24        | 22        | 30   |
|            | Total | 358           | 240  | 250       | 341       | 333  |
| M          | MA    | 34            | 51   | 131       | 50        | 43   |
|            | MB    | 7             | 7    | 5         | 5         | 8    |
|            | MC    | 4             | 0    | 0         | 0         | 0    |
|            | MD    | 0             | 5    | 17        | 7         | 19   |
|            | Total | 45            | 63   | 153       | 62        | 70   |
