# Supplementary material for: Genomic regions with distinct genomic distance conservation in vertebrate genomes
Source: PubMed Central journal article supplement (PMC2667192; doi:10.1186/1471-2164-10-133), 2009-03-27
Supplement: 1471-2164-10-133-S9.pdf [file 1471-2164-10-133-S9.pdf]

**Additional file 9:** Genomic distance between HCE pairs (bp).

|           | Min | Median | Mean  | Max    | Total    |
|-----------|-----|--------|-------|--------|----------|
| Group one | 2   | 575    | 2783  | 114900 | 523255   |
| Group two | 650 | 25640  | 46090 | 693200 | 9909207  |
| Total     | 2   | 6764   | 25890 | 693200 | 10432462 |

The human genome was used as baseline. Wilcoxon unpaired test was used to test the significance of the difference between the two groups of IHRs' genomic distances ( $p < 2.2e^{-16}$ ).
