# Supplementary material for: Genomic regions with distinct genomic distance conservation in vertebrate genomes
Source: PubMed Central journal article supplement (PMC2667192; doi:10.1186/1471-2164-10-133), 2009-03-27
Supplement: 1471-2164-10-133-S11.pdf [file 1471-2164-10-133-S11.pdf]

**Additional file 11:** Relative distance differences (|RDD|) for HCE pairs in pair wise genome comparisons.

|           | Human  |        | Mouse  |        | Rat    |        | Chicken |        | Zebrafish |        | Tetraodon |        | Fugu   |        |
|-----------|--------|--------|--------|--------|--------|--------|---------|--------|-----------|--------|-----------|--------|--------|--------|
|           | Median | Mean   | Median | Mean   | Median | Mean   | Median  | Mean   | Median    | Mean   | Median    | Mean   | Median | Mean   |
| Human     | -      | -      | 0.1463 | 0.2098 | 0.1731 | 0.3552 | 0.6221  | 0.6349 | 0.9025    | 0.9149 | 1.558     | 1.4792 | 1.5837 | 1.4927 |
| Mouse     | 0.0149 | 0.0638 | -      | -      | 0.0709 | 0.2824 | 0.5277  | 0.592  | 0.8828    | 0.8968 | 1.5254    | 1.448  | 1.5518 | 1.4626 |
| Rat       | 0.0171 | 0.0748 | 0.0072 | 0.0775 | -      | -      | 0.5807  | 0.6983 | 0.9751    | 0.9864 | 1.5375    | 1.4854 | 1.5657 | 1.5035 |
| Chicken   | 0.0438 | 0.1459 | 0.0537 | 0.1779 | 0.0475 | 0.1921 | -       | -      | 0.6354    | 0.7333 | 1.2225    | 1.162  | 1.233  | 1.2041 |
| Zebrafish | 0.2533 | 0.4681 | 0.2737 | 0.4829 | 0.2586 | 0.4929 | 0.3091  | 0.5131 | -         | -      | 1.0941    | 1.0621 | 1.0585 | 1.073  |
| Tetraodon | 0.2397 | 0.3612 | 0.2717 | 0.3895 | 0.2596 | 0.3919 | 0.2588  | 0.3796 | 0.365     | 0.5665 | -         | -      | 0.0535 | 0.1973 |
| Fugu      | 0.2152 | 0.3951 | 0.2428 | 0.4212 | 0.24   | 0.425  | 0.2416  | 0.4073 | 0.3364    | 0.6009 | 0.0423    | 0.1827 | -      | -      |

Down triangle matrix for HCE pairs of IHR1 and up triangle matrix for HCE pairs of IHR2.
