# Supplementary material for: Genomic regions with distinct genomic distance conservation in vertebrate genomes
Source: PubMed Central journal article supplement (PMC2667192; doi:10.1186/1471-2164-10-133), 2009-03-27

**Additional file 12:** Frequency of distances between intergenic IHRs and the nearest genes in the human genome. (Black bar: all IHRs; blue bar: IHRs with CpG islands).

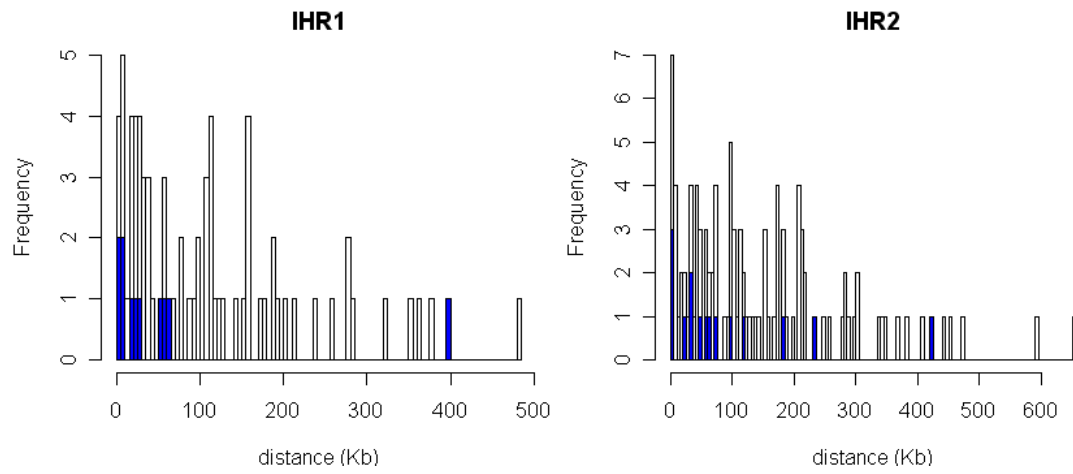

Supplement: 1471-2164-10-133-S12.pdf [file 1471-2164-10-133-S12.pdf]
