# Supplementary material for: Genomic regions with distinct genomic distance conservation in vertebrate genomes
Source: PubMed Central journal article supplement (PMC2667192; doi:10.1186/1471-2164-10-133), 2009-03-27
Supplement: 1471-2164-10-133-S13.pdf [file 1471-2164-10-133-S13.pdf]

**Additional file 13:** Length of genomic regions containing same group of IHRs and the number of IHRs in the region.

| Number of IHRs |                 | 1    | 2    | 3     | 4     | 5    | 6     | 7      | 8     | 9  | 10  |
|----------------|-----------------|------|------|-------|-------|------|-------|--------|-------|----|-----|
| IHR1           | Number of cases | 58   | 26   | 6     | 4     | 2    | 0     | 1      | 1     | 1  | 1   |
|                | Length (Kb)     | 1.8  | 5716 | 23093 | 11655 | 129  | -     | 105099 | 29456 | 41 | 902 |
| IHR2           | Number of cases | 49   | 22   | 20    | 4     | 4    | 2     | 2      | 0     | 0  | 0   |
|                | Length (Kb)     | 37.4 | 5260 | 7272  | 4932  | 2901 | 17161 | 80354  | -     | -  | -   |
