# Supplementary material for: Genomic regions with distinct genomic distance conservation in vertebrate genomes
Source: PubMed Central journal article supplement (PMC2667192; doi:10.1186/1471-2164-10-133), 2009-03-27
Supplement: 1471-2164-10-133-S14.pdf [file 1471-2164-10-133-S14.pdf]

**Additional file 14: Overlap between IHRs and TFRs.**

|                                               | IHR1         |              |             | IHR2         |              |             |
|-----------------------------------------------|--------------|--------------|-------------|--------------|--------------|-------------|
|                                               | Observed     | p* value (<) | Expected    | Observed     | p* value (<) | Expected    |
| Number of IHRs intersected with TFR(s)        | 112<br>(60%) | 0.001        | 5<br>(2.6%) | 112<br>(52%) | 0.001        | 27<br>(12%) |
| Average percentage of TFR length over the IHR | 90%          | 0.15         | 73%         | 27%          | 0.014        | 18%         |

\* Randomly selected human genomic regions were used to test the significance, the fraction of times in which the random sample set average scored greater than the average of the IHRs provided the basis for the statistical significance.
