# Supplementary material for: Genomic regions with distinct genomic distance conservation in vertebrate genomes
Source: PubMed Central journal article supplement (PMC2667192; doi:10.1186/1471-2164-10-133), 2009-03-27

**Additional file 15:** Frequency of random regions with human INDEL variations (insertion and deletion).

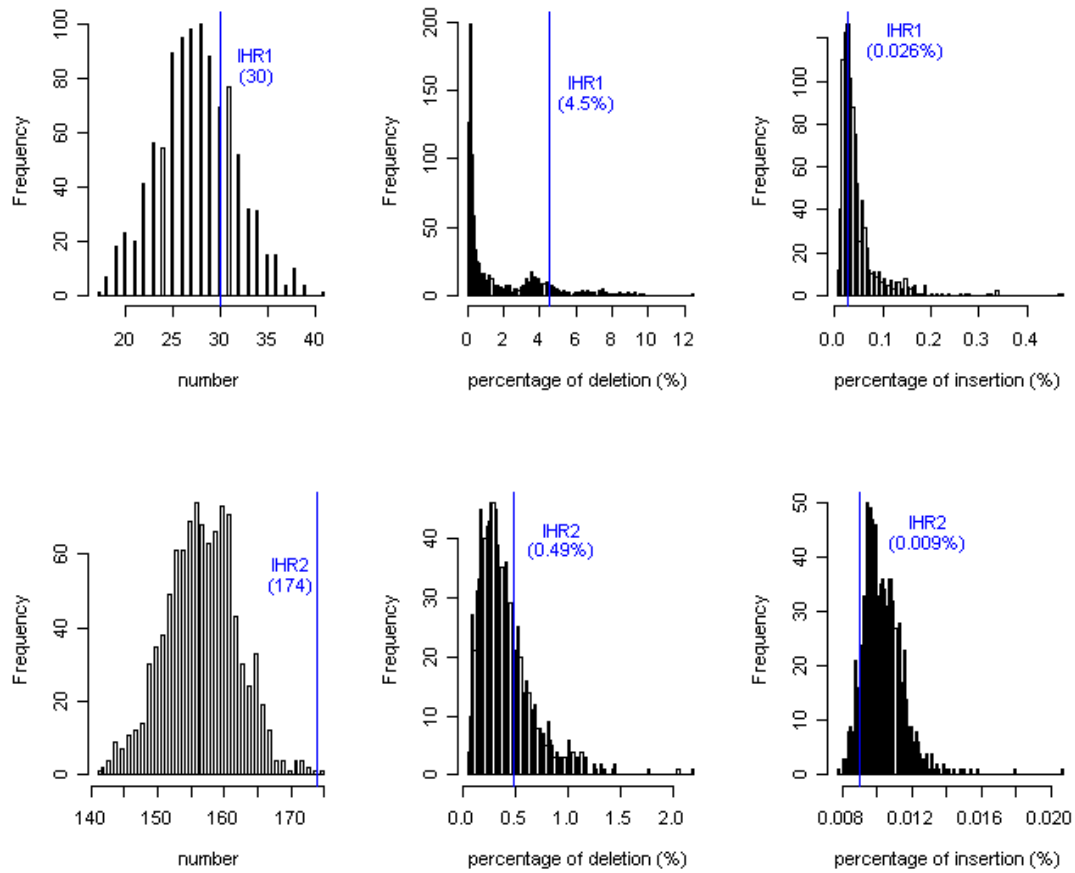

Supplement: 1471-2164-10-133-S15.pdf [file 1471-2164-10-133-S15.pdf]
