# Supplementary material for: Genomic regions with distinct genomic distance conservation in vertebrate genomes
Source: PubMed Central journal article supplement (PMC2667192; doi:10.1186/1471-2164-10-133), 2009-03-27
Supplement: 1471-2164-10-133-S16.pdf [file 1471-2164-10-133-S16.pdf]

**Additional file 16:** Number of IHRs containing CpG islands and the percentage of CpG islands' length.

|                                               | IHR1              |          | IHR2              |          |
|-----------------------------------------------|-------------------|----------|-------------------|----------|
|                                               | Observed          | Expected | Observed          | Expected |
| Percentage of IHRs contain CpG island (%)     | 10.6 (p* = 0.001) | 0.5      | 14.4 (p* = 0.001) | 2.3      |
| Average percentage of CpG islands' length (%) | 44.7 (p* = 0.11)  | 13.6     | 7.1 (p* = 0.06)   | 3.5      |

\* Randomly selected human genomic regions were used to test the significance; p value was given in the bracket. Two sample Wilcoxon test was used to test the significance of difference in the percentage of CpG islands length between IHR1s and IHR2s:  $p = 5.5e-6$
