# Supplementary material for: Genomic regions with distinct genomic distance conservation in vertebrate genomes
Source: PubMed Central journal article supplement (PMC2667192; doi:10.1186/1471-2164-10-133), 2009-03-27

**Additional file 17:** The number of IHRs intersected with CpG islands is significantly greater than regions selected randomly corresponding to the same size and length (p value < 0.001).

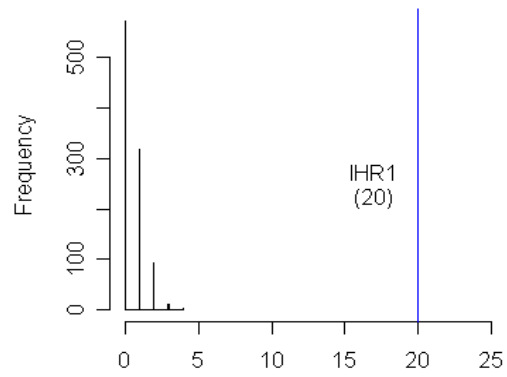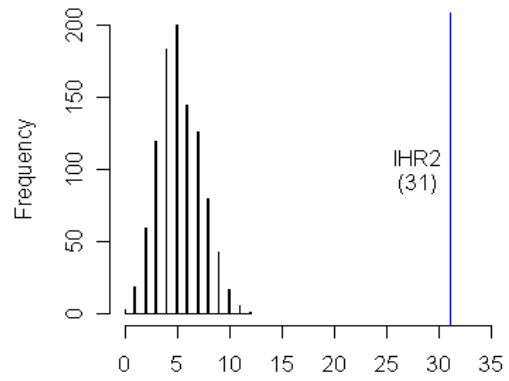

Supplement: 1471-2164-10-133-S17.pdf [file 1471-2164-10-133-S17.pdf]
