# Supplementary material for: Genomic regions with distinct genomic distance conservation in vertebrate genomes
Source: PubMed Central journal article supplement (PMC2667192; doi:10.1186/1471-2164-10-133), 2009-03-27
Supplement: 1471-2164-10-133-S19.pdf [file 1471-2164-10-133-S19.pdf]

**Additional file 19:** Copy number of human HCEs in seven genomes.

|                 | mouse |      | rat  |      | chicken |      | frog |      | zebrafish |      | fugu |      | tetraodon |      |
|-----------------|-------|------|------|------|---------|------|------|------|-----------|------|------|------|-----------|------|
|                 | O     | E    | O    | E    | O       | E    | O    | E    | O         | E    | O    | E    | O         | E    |
| Single          | 7150  | 6419 | 6962 | 6261 | 5137    | 5025 | 4474 | 4588 | 1867      | 2701 | 2668 | 3061 | 2173      | 2372 |
| Multi           | 314   | 1044 | 319  | 1019 | 706     | 817  | 861  | 746  | 1274      | 439  | 892  | 498  | 586       | 386  |
| HCE Total       | 7464  |      | 7281 |      | 5843    |      | 5335 |      | 3141      |      | 3560 |      | 2759      |      |
| Multi/Total (%) | 4.2   | 13.9 | 4.4  | 13.9 | 12.1    | 13.9 | 16.1 | 13.9 | 40.5      | 13.9 | 25.0 | 13.9 | 21.2      | 13.9 |

Chi-squared contingency table test was used to calculate the expected copy number and test the significance. **O** stand for observed copy number and **E** for expected. (X-squared = 3515.043, df = 6, p-value < 2.2e-16)
